# Supplementary material for: Assessment of the Role of Artificial Intelligence in the Association Between Time of Day and Colonoscopy Quality
Source: PubMed Central journal article supplement (PMC9890283; doi:10.1001/jamanetworkopen.2022.53840), 2023-01-31
Supplement: jamanetwopen-e2253840-s001.pdf [file jamanetwopen-e2253840-s001.pdf]

## Supplemental Online Content

Lu Z, Zhang L, Yao L, et al. Assessment of the role of artificial intelligence in the association between time of day and colonoscopy quality. *JAMA Netw Open*. 2023;6(1):e2253840. doi:10.1001/jamanetworkopen.2022.53840

### **eMethods.**

**eFigure.** ADR/PDR at Each Hour of the Day

**eTable 1.** Comparison of Detection Rates Between Early and Late Sessions

**eTable 2.** Detection Rates Between Early and Late Session in Different RCTs

**eTable 3.** Detection Rates Among Individual Endoscopists

**eTable 4.** Comparison of AI Assistance Capabilities Between Early and Late Sessions

**eTable 5.** AI Assistance Capabilities Between Early and Late Sessions in Different RCTs

**eTable 6.** Different AI Systems Assistance Capabilities Among Different Sizes

**eTable 7.** Different AI Systems Assistance Capabilities Among Different Locations

This supplemental material has been provided by the authors to give readers additional information about their work.

## eMethods

### Intervention

In the RCT 1, patients were assigned to either control group (henceforth called control-1 group) or CAQ group (henceforth called CAQ-1 group). In the CAQ-1 group, a real-time quality improvement system was constructed to assist endoscopists, which could achieve real-time withdrawal speed, colonoscopy intubation, and withdrawal time monitoring, and remind endoscopists of blind spots caused by endoscope slipping. To obtain the withdrawal speed, the similarity among continuous colonoscopy frames was calculated using the perceptual hash algorithm. The value of less than 40 was set as safe withdrawal speed, 40-44 as t alarm withdrawal speed and more than 44 as dangerous withdrawal speed after validation. There's no intervention in the control-a group. The results showed that ADR was significantly higher in the CAQ group than in the control group (16% vs 8%,  $P=0.001$ ).

In the RCT 2, four groups were evaluated: control group (henceforth called control-2 group), CAQ group (henceforth called CAQ-2 group), CADe group, combination group. The interventions in CAQ-2 group were the same as those in CAQ-1 group. In the CADe group, a real-time polyp detection system was constructed to assist endoscopists. The combination group included both interventions from CAQ group and CADe group. There's no intervention in the control-2 group. The results showed that the ADR was significantly higher in the CADe group (21.27% vs 14.76%,  $P=0.045$ ), CAQ-2 group (24.54% vs 14.76%,  $P=0.004$ ) and combination group (30.60% vs 14.76%,  $P<0.001$ ) compared with the control-2 group, respectively.

### Definition

ADR was defined as the proportion of patients having at least one histologically confirmed adenoma during colonoscopy. Polyp detection rate (PDR) was defined as the proportion of patients who have at least one polyp detected during colonoscopy. We defined proximal colon as cecum, ascending colon, hepatic flexure or transverse colon, distal colon as splenic flexure, descending colon, sigmoid colon or rectum. Advanced adenoma was defined as adenoma with one of the following features: (1)  $\geq 1$  cm as documented by the endoscopist, (2) with villous architecture on histology or (3) with high-grade dysplasia.

## eFigure. ADR/PDR at Each Hour of the Day

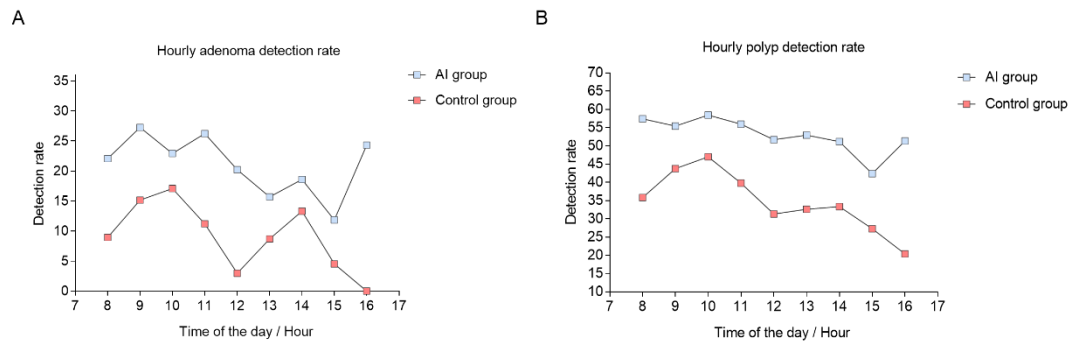

A: Adenoma detection rate (ADR) and B: polyp detection rate (PDR) in each hour

**eTable 1. Comparison of Detection Rates Between Early and Late Sessions**

|                                                    | Early session | Late session | P    | OR (95% CI)      |
|----------------------------------------------------|---------------|--------------|------|------------------|
| <b>Advanced adenoma detection rate</b>             |               |              |      |                  |
| Control-c group                                    | 5(1.40%)      | 3(1.14%)     | .52  | 1.66(0.36-7.71)  |
| AI group                                           | 26(3.80%)     | 17(3.57%)    | .73  | 1.12(0.59-2.13)  |
| CADe group                                         | 4(2.41%)      | 1(0.98%)     | .38  | 2.97(0.27-33.08) |
| CAQ-c group                                        | 11(3.15%)     | 13(4.73%)    | .34  | 0.66(0.28-1.55)  |
| Combination group                                  | 11(6.51%)     | 3(3.03%)     | .27  | 2.15(0.56-8.27)  |
| <b>Adenomas detected per colonoscopy, mean(SD)</b> |               |              |      |                  |
| Control-c group                                    | 0.15(0.37)    | 0.06(0.25)   | .01  | 2.10(1.16-3.80)  |
| AI group                                           | 0.27(0.53)    | 0.25(0.49)   | .99  | 1.00(0.79-1.27)  |
| CADe group                                         | 0.28(0.52)    | 0.18(0.43)   | .10  | 1.63(0.91-2.91)  |
| CAQ-c group                                        | 0.21(0.44)    | 0.22(0.47)   | .69  | 0.93(0.66-1.32)  |
| Combination group                                  | 0.36(0.69)    | 0.39(0.59)   | .62  | 0.90(0.60-1.35)  |
| <b>Polyps detected per colonoscopy, mean(SD)</b>   |               |              |      |                  |
| Control-c group                                    | 1.09(1.92)    | 0.77(1.57)   | .40  | 1.08(0.91-1.29)  |
| AI group                                           | 1.61(2.47)    | 1.45(2.21)   | .42  | 1.04(0.95-1.15)  |
| CADe group                                         | 1.63(2.35)    | 1.49(2.30)   | .92  | 1.01(0.82-1.25)  |
| CAQ-c group                                        | 1.28(1.91)    | 1.33(2.13)   | .46  | 0.95(0.83-1.09)  |
| Combination group                                  | 2.26(3.35)    | 1.72(2.32)   | .002 | 1.34(1.12-1.61)  |

**eTable 2. Detection Rates Between Early and Late Session in Different RCTs**

|                   | ADR           |              | P   | OR (95% CI)     | PDR           |              | P   | OR (95% CI)     |
|-------------------|---------------|--------------|-----|-----------------|---------------|--------------|-----|-----------------|
|                   | Early session | Late session |     |                 | Early session | Late session |     |                 |
| RCT 1             |               |              |     |                 |               |              |     |                 |
| Control-1 group   | 17(9.83%)     | 10(5.68%)    | .25 | 1.64(0.70-3.81) | 62(35.84%)    | 56(31.82%)   | .67 | 1.11(0.68-1.82) |
| CAQ-1group        | 24(13.71%)    | 34(18.89%)   | .16 | 0.65(0.36-1.18) | 74(42.29%)    | 92(51.11%)   | .09 | 0.68(0.43-1.06) |
| RCT 2             |               |              |     |                 |               |              |     |                 |
| Control-2 group   | 32(17.39%)    | 5(5.75%)     | .02 | 3.22(1.20-8.70) | 86(46.74%)    | 27(31.03%)   | .04 | 1.83(1.02-3.28) |
| CAQ-2 group       | 44(25.29%)    | 21(22.11%)   | .41 | 1.32(0.69-2.52) | 97(55.75%)    | 48(50.53%)   | .39 | 1.29(0.73-2.28) |
| CADe group        | 42(25.30%)    | 15(14.71%)   | .08 | 1.97(0.93-4.17) | 102(61.45%)   | 47(46.08%)   | .12 | 1.58(0.89-2.81) |
| Combination group | 47(27.81%)    | 35(35.35%)   | .13 | 0.63(0.34-1.15) | 110(65.09%)   | 62(62.63%)   | .65 | 1.15(0.63-2.08) |

| <b>eTable 3. Detection Rates Among Individual Endoscopists</b> |                      |     |               |     |                  |      |                      |     |               |      |                  |       |
|----------------------------------------------------------------|----------------------|-----|---------------|-----|------------------|------|----------------------|-----|---------------|------|------------------|-------|
|                                                                | Endoscopist 1        |     |               |     |                  |      | Endoscopist 2        |     |               |      |                  |       |
|                                                                | Control-c<br>(n=144) | P   | AI<br>(n=254) | P   | Total<br>(n=398) | P    | Control-c<br>(n=114) | P   | AI<br>(n=344) | P    | Total<br>(n=458) | P     |
| <b>Adenoma detection rate</b>                                  |                      |     |               |     |                  |      |                      |     |               |      |                  |       |
| AI group                                                       | -                    | -   | -             | -   | 49(19.29%)       | <.05 | -                    | -   | -             | -    | 100(29.07%)      | <.001 |
| Control-c group                                                | -                    | -   | -             | -   | 13(9.03%)        |      | -                    | -   | -             | -    | 13(11.40%)       |       |
| <b>Time slot 1</b>                                             |                      |     |               |     |                  |      |                      |     |               |      |                  |       |
| Early session                                                  | 9(12.16%)            | .20 | 22(17.32%)    | .24 | 31(15.42%)       | .72  | 12(16.00%)           | .05 | 73(31.33%)    | .16  | 85(27.60%)       | .05   |
| Late session                                                   | 4(5.71%)             |     | 27(21.26%)    |     | 31(15.74%)       |      | 1(2.56%)             |     | 27(24.32%)    |      | 28(18.67%)       |       |
| <b>Time slot 2</b>                                             |                      |     |               |     |                  |      |                      |     |               |      |                  |       |
| AM                                                             | 11(11.34%)           | .44 | 38(20.21%)    | .60 | 49(17.19%)       | .27  | 11(10.68%)           | .67 | 87(30.53%)    | .08  | 98(25.26%)       | .12   |
| PM                                                             | 2(4.26%)             |     | 11(16.67%)    |     | 13(11.50%)       |      | 2(18.18%)            |     | 13(22.03%)    |      | 15(21.43%)       |       |
| <b>Withdrawal time</b>                                         |                      |     |               |     |                  |      |                      |     |               |      |                  |       |
| ≥ 6min                                                         | 7(11.11%)            | .66 | 43(20.19%)    | .57 | 50(18.12%)       | .42  | 9(9.68%)             | .07 | 98(30.43%)    | <.05 | 107(25.78%)      | .48   |
| < 6min                                                         | 6(7.41%)             |     | 6(14.63%)     |     | 12(9.84%)        |      | 4(19.05%)            |     | 2(9.09%)      |      | 6(13.95%)        |       |
| <b>BBPS</b>                                                    |                      |     |               |     |                  |      |                      |     |               |      |                  |       |
| ≥2 in all segments                                             | 12(9.16%)            | .51 | 45(19.74%)    | .44 | 57(15.88%)       | .40  | 10(11.36%)           | .92 | 81(28.93%)    | .55  | 91(24.73%)       | .85   |
| <2 in any segment                                              | 1(7.69%)             |     | 4(15.38%)     |     | 5(12.82%)        |      | 3(11.54%)            |     | 19(29.69%)    |      | 22(24.44%)       |       |
| <b>Polyp detection rate</b>                                    |                      |     |               |     |                  |      |                      |     |               |      |                  |       |
| AI group                                                       | -                    | -   | -             | -   | 142(55.91%)      | .007 | -                    | -   | -             | -    | 198(57.56%)      | <.001 |
| Control group                                                  | -                    | -   | -             | -   | 49(34.03%)       |      | -                    | -   | -             | -    | 41(35.96%)       |       |
| <b>Time slot 1</b>                                             |                      |     |               |     |                  |      |                      |     |               |      |                  |       |
| Early session                                                  | 24(32.43%)           | .37 | 73(57.48%)    | .90 | 97(48.26%)       | .96  | 31(41.33%)           | .10 | 137(58.80%)   | .87  | 168(54.55%)      | .37   |
| Late session                                                   | 25(35.71%)           |     | 69(54.33%)    |     | 94(47.72%)       |      | 10(25.64%)           |     | 61(54.95%)    |      | 71(47.33%)       |       |
| <b>Time slot 2</b>                                             |                      |     |               |     |                  |      |                      |     |               |      |                  |       |
| AM                                                             | 38(39.18%)           | .02 | 103(54.79%)   | .19 | 141(49.47%)      | .74  | 37(35.92%)           | .94 | 167(58.60%)   | .31  | 204(52.58%)      | .25   |
| PM                                                             | 11(23.40%)           |     | 39(59.09%)    |     | 50(44.25%)       |      | 4(36.36%)            |     | 31(52.54%)    |      | 35(50.00%)       |       |

|                        |                 |          |                  |          |                  |     |                 |         |                  |      |                  |     |
|------------------------|-----------------|----------|------------------|----------|------------------|-----|-----------------|---------|------------------|------|------------------|-----|
| <b>Withdrawal time</b> |                 |          |                  |          |                  |     |                 |         |                  |      |                  |     |
| ≥ 6min                 | 29(46.03%)<br>) | .00<br>5 | 124(58.22%)<br>) | <.0<br>5 | 153(55.43%)<br>) | .01 | 34(36.56%)<br>) | .7<br>6 | 193(59.94%)<br>) | .003 | 227(54.70%)<br>) | .04 |
| < 6min                 | 20(24.69%)<br>) |          | 18(43.90%)       |          | 38(31.15%)       |     | 7(33.33%)       |         | 5(22.73%)        |      | 12(27.91%)       |     |
| <b>BBPS</b>            |                 |          |                  |          |                  |     |                 |         |                  |      |                  |     |
| ≥2 in all segments     | 42(32.06%)<br>) | .18      | 131(57.46%)<br>) | .18      | 173(48.19%)<br>) | .50 | 28(31.82%)<br>) | .2<br>4 | 166(59.29%)<br>) | .36  | 194(52.72%)<br>) | .76 |
| <2 in any segment      | 7(53.85%)       |          | 11(42.31%)       |          | 18(46.15%)       |     | 13(50.00%)<br>) |         | 32(50.00%)       |      | 45(50.00%)       |     |

(continued)

|                               | Endoscopist 3        |     |               |      |                  |      | Endoscopist 4       |     |              |     |                  |     |
|-------------------------------|----------------------|-----|---------------|------|------------------|------|---------------------|-----|--------------|-----|------------------|-----|
|                               | Control-c<br>(n=102) | P   | AI<br>(n=266) | P    | Total<br>(n=368) | P    | Control-c<br>(n=97) | P   | AI<br>(n=87) | P   | Total<br>(n=184) | P   |
| <b>Adenoma detection rate</b> |                      |     |               |      |                  |      |                     |     |              |     |                  |     |
| AI group                      | -                    | -   | -             | -    | 64(24.06%)       | .07  | -                   | -   | -            | -   | 18(20.69%)       | .42 |
| Control-c group               | -                    | -   | -             | -    | 14(13.73%)       |      | -                   | -   | -            | -   | 14(14.43%)       |     |
| <b>Time slot 1</b>            |                      |     |               |      |                  |      |                     |     |              |     |                  |     |
| Early session                 | 13(17.33%)           | .17 | 38(22.62%)    | .47  | 51(20.99%)       | .89  | 9(16.07%)           | .67 | 6(12.50%)    | .04 | 15(14.42%)       | .12 |
| Late session                  | 1(3.70%)             |     | 26(26.53%)    |      | 27(21.60%)       |      | 5(12.20%)           |     | 12(30.77%)   |     | 17(21.25%)       |     |
| <b>Time slot 2</b>            |                      |     |               |      |                  |      |                     |     |              |     |                  |     |
| AM                            | 13(14.29%)           | .92 | 57(23.65%)    | .64  | 70(21.08%)       | .81  | 13(17.11%)          | .13 | 15(21.74%)   | .32 | 28(19.31%)       | .08 |
| PM                            | 1(9.09%)             |     | 7(28.00%)     |      | 8(22.22%)        |      | 1(4.76%)            |     | 3(16.67%)    |     | 4(10.26%)        |     |
| <b>Withdrawal time</b>        |                      |     |               |      |                  |      |                     |     |              |     |                  |     |
| ≥ 6min                        | 14(17.72%)           | NA  | 60(26.67%)    | .03  | 74(24.34%)       | .004 | 5(22.73%)           | .17 | 7(21.21%)    | .93 | 12(21.82%)       | .47 |
| < 6min                        | 0(0.00%)             |     | 4(9.76%)      |      | 4(6.25%)         |      | 9(12.00%)           |     | 11(20.37%)   |     | 20(15.50%)       |     |
| <b>BBPS</b>                   |                      |     |               |      |                  |      |                     |     |              |     |                  |     |
| ≥2 in all segments            | 13(13.83%)           | .47 | 55(23.61%)    | .82  | 68(20.80%)       | .91  | 14(15.22%)          | NA  | 17(20.99%)   | .70 | 31(17.92%)       | .48 |
| <2 in any segment             | 1(12.50%)            |     | 9(27.27%)     |      | 10(24.39%)       |      | 0(0.00%)            |     | 1(16.67%)    |     | 1(9.09%)         |     |
| <b>Polyp detection rate</b>   |                      |     |               |      |                  |      |                     |     |              |     |                  |     |
| AI group                      | -                    | -   | -             | -    | 153(57.52%)      | .04  | -                   | -   | -            | -   | 41(47.13%)       | .66 |
| Control group                 | -                    | -   | -             | -    | 45(44.12%)       |      | -                   | -   | -            | -   | 43(44.33%)       |     |
| <b>Time slot 1</b>            |                      |     |               |      |                  |      |                     |     |              |     |                  |     |
| Early session                 | 38(50.67%)           | .09 | 99(58.93%)    | .42  | 137(56.38%)      | .17  | 29(51.79%)          | .49 | 19(39.58%)   | .17 | 48(46.15%)       | .64 |
| Late session                  | 7(25.93%)            |     | 54(55.10%)    |      | 61(48.80%)       |      | 14(34.15%)          |     | 22(56.41%)   |     | 36(45.00%)       |     |
| <b>Time slot 2</b>            |                      |     |               |      |                  |      |                     |     |              |     |                  |     |
| AM                            | 39(42.86%)           | .32 | 141(58.51%)   | .30  | 180(54.22%)      | .71  | 38(50.00%)          | .06 | 33(47.83%)   | .55 | 71(48.97%)       | .10 |
| PM                            | 6(54.55%)            |     | 12(48.00%)    |      | 18(50.00%)       |      | 5(23.81%)           |     | 8(44.44%)    |     | 13(33.33%)       |     |
| <b>Withdrawal time</b>        |                      |     |               |      |                  |      |                     |     |              |     |                  |     |
| ≥ 6min                        | 36(45.57%)           | .57 | 139(61.78%)   | .002 | 175(57.57%)      | .009 | 13(59.09%)          | .82 | 14(42.42%)   | .18 | 27(49.09%)       | .55 |
| < 6min                        | 9(39.13%)            |     | 14(34.15%)    |      | 23(35.94%)       |      | 30(40.00%)          |     | 27(50.00%)   |     | 57(44.19%)       |     |
| <b>BBPS</b>                   |                      |     |               |      |                  |      |                     |     |              |     |                  |     |
| ≥2 in all segments            | 42(44.68%)           | .80 | 135(57.94%)   | .34  | 177(54.13%)      | .47  | 40(43.48%)          | .79 | 39(48.15%)   | .17 | 79(45.66%)       | .21 |
| <2 in any segment             | 3(37.50%)            |     | 18(54.55%)    |      | 21(51.22%)       |      | 3(60.00%)           |     | 2(33.33%)    |     | 5(45.45%)        |     |

| <b>eTable 4. Comparison of AI Assistance Capabilities Between Early and Late Sessions</b> |                          |       |                 |                          |       |                   |
|-------------------------------------------------------------------------------------------|--------------------------|-------|-----------------|--------------------------|-------|-------------------|
|                                                                                           | Early session            |       |                 | Late session             |       |                   |
|                                                                                           | % vs %                   | P     | OR (95% CI)     | % vs %                   | P     | OR (95% CI)       |
| <b>Adenoma detection rate</b>                                                             |                          |       |                 |                          |       |                   |
| AI VS Control-c                                                                           | 22.95% vs 13.73%         | .01   | 1.60(1.10-2.34) | 22.06% vs 5.70%          | <.001 | 3.81(2.10-6.91)   |
| CADe VS Control-c                                                                         | 25.30% vs 13.73%         | .15   | 1.49(0.87-2.56) | 14.71% vs 5.70%          | .05   | 2.75(0.98-7.68)   |
| CAQ-c VS Control-c                                                                        | 19.48% vs 13.73%         | .06   | 1.51(0.98-2.32) | 20.00% vs 5.70%          | <.001 | 3.56(1.89-6.72)   |
| Combination VS Control-c                                                                  | 27.81% vs 13.73%         | .02   | 1.89(1.12-3.21) | 35.35% vs 5.70%          | <.001 | 10.40(3.85-28.05) |
| <b>Polyp detection rate</b>                                                               |                          |       |                 |                          |       |                   |
| AI VS Control-c                                                                           | 55.99% vs 41.46%         | .005  | 1.53(1.14-2.06) | 52.31% vs 31.56%         | .001  | 1.90(1.32-2.73)   |
| CADe VS Control-c                                                                         | 61.45% vs 41.46%         | .02   | 1.77(1.12-2.81) | 46.08% vs 31.56%         | .18   | 1.52(0.83-2.79)   |
| CAQ-c VS Control-c                                                                        | 49.00% vs 41.46%         | .10   | 1.33(0.95-1.86) | 50.91% vs 31.56%         | .002  | 1.91(1.28-2.85)   |
| Combination VS CONTROL-c                                                                  | 65.09% vs 41.46%         | <.001 | 2.50(1.56-4.00) | 62.63% vs 31.56%         | .002  | 2.75(1.46-5.18)   |
| <b>Advanced adenoma detection rate</b>                                                    |                          |       |                 |                          |       |                   |
| AI VS Control-c                                                                           | 3.80% vs 1.40%           | .70   | 1.33(0.30-5.85) | 3.57% vs 1.14%           | .10   | 3.01(0.81-11.15)  |
| CADe VS Control-c                                                                         | 2.41% vs 1.40%           | .71   | 1.30(0.32-5.35) | 0.98% vs 1.14%           | .99   | NA                |
| CAQ-c VS Control-c                                                                        | 3.15% vs 1.40%           | .23   | 1.97(0.65-5.96) | 4.73% vs 1.14%           | .07   | 3.48(0.92-13.14)  |
| Combination VS Control-c                                                                  | 6.51% vs 1.40%           | .10   | 2.60(0.83-8.18) | 3.03% vs 1.14%           | .99   | NA                |
| <b>Adenomas detected per colonoscopy, mean(SD)</b>                                        |                          |       |                 |                          |       |                   |
| AI VS Control-c                                                                           | 0.27(0.53) vs 0.15(0.37) | .009  | 1.52(1.11-2.08) | 0.25(0.49) vs 0.06(0.25) | <.001 | 3.12(1.80-5.36)   |
| CADe VS Control-c                                                                         | 0.28(0.52) vs 0.15(0.37) | .09   | 1.45(0.94-2.23) | 0.18(0.43) vs 0.06(0.25) | .04   | 2.51(1.04-6.06)   |
| CAQ-c VS Control-c                                                                        | 0.21(0.44) vs 0.15(0.37) | .06   | 1.42(0.99-2.04) | 0.22(0.47) vs 0.06(0.25) | <.001 | 3.07(1.73-5.46)   |
| Combination VS CONTROL-c                                                                  | 0.36(0.69) vs 0.15(0.37) | .004  | 1.83(1.21-2.76) | 0.39(0.59) vs 0.06(0.25) | <.001 | 4.95(2.27-10.76)  |
| <b>Polyps detected per colonoscopy, mean(SD)</b>                                          |                          |       |                 |                          |       |                   |
| AI VS Control-c                                                                           | 1.61(2.47) vs 1.09(1.92) | <.001 | 1.27(1.12-1.43) | 1.45(2.21) vs 0.77(1.57) | .001  | 1.32(1.12-1.56)   |
| CADe VS Control-c                                                                         | 1.63(2.35) vs 1.09(1.92) | .42   | 1.07(0.91-1.27) | 1.49(2.30) vs 0.77(1.57) | .05   | 1.28(1.00-1.64)   |
| CAQ-c VS Control-c                                                                        | 1.28(1.91) vs 1.09(1.92) | .08   | 1.13(0.99-1.30) | 1.33(2.13) vs 0.77(1.57) | .002  | 1.32(1.10-1.58)   |



|                          |                          |       |                 |                          |     |                 |
|--------------------------|--------------------------|-------|-----------------|--------------------------|-----|-----------------|
| Combination VS Control-c | 2.26(3.35) vs 1.09(1.92) | <.001 | 1.60(1.37-1.87) | 1.72(2.32) vs 0.77(1.57) | .20 | 1.17(0.92-1.50) |
|--------------------------|--------------------------|-------|-----------------|--------------------------|-----|-----------------|

| <b>eTable 5. AI Assistance Capabilities Between Early and Late Sessions in Different RCTs</b> |               |                 |              |                  |
|-----------------------------------------------------------------------------------------------|---------------|-----------------|--------------|------------------|
|                                                                                               | Early session |                 | Late session |                  |
|                                                                                               | P             | OR (95% CI)     | P            | OR (95% CI)      |
| <b>Adenoma detection rate</b>                                                                 |               |                 |              |                  |
| Control-1 VS CAQ-1                                                                            | .37           | 1.41(0.67-2.94) | .003         | 3.30(1.49-7.32)  |
| Control-2 VS CAQ-2                                                                            | <.05          | 1.73(1.01-2.98) | .005         | 4.74(1.60-14.11) |
| Control-2 VS CADe                                                                             | .15           | 1.51(0.87-2.64) | .05          | 2.97(0.98-8.99)  |
| Control-2 VS Combination                                                                      | .03           | 1.82(1.07-3.10) | <.001        | 9.92(3.24-30.41) |
| <b>Polyp detection rate</b>                                                                   |               |                 |              |                  |
| Control-1 VS CAQ-1                                                                            | .77           | 1.08(0.65-1.79) | .04          | 1.68(1.01-2.77)  |
| Control-2 VS CAQ-2                                                                            | .04           | 1.63(1.02-2.59) | .02          | 2.33(1.18-4.62)  |
| Control-2 VS CADe                                                                             | .02           | 1.77(1.11-2.82) | .03          | 2.05(1.05-3.98)  |
| Control-2 VS Combination                                                                      | <.001         | 2.39(1.48-3.85) | <.001        | 4.04(1.97-8.32)  |

| <b>eTable 6. Different AI Systems Assistance Capabilities Among Different Sizes</b> |                 |             |      |                  |                 |             |       |                  |
|-------------------------------------------------------------------------------------|-----------------|-------------|------|------------------|-----------------|-------------|-------|------------------|
|                                                                                     | Early session   |             |      |                  | Late session    |             |       |                  |
|                                                                                     | Control-c group | AI system   | P    | OR (95% CI)      | Control-c group | AI system   | P     | OR (95% CI)      |
| <b>ADR</b>                                                                          |                 |             |      |                  |                 |             |       |                  |
| <b>CADe system</b>                                                                  |                 |             |      |                  |                 |             |       |                  |
| Diminutive (≤5 mm)                                                                  | 47(13.17%)      | 39(23.49%)  | .08  | 1.59(0.95-2.68)  | 14(5.32%)       | 16(15.69%)  | .06   | 2.42(0.97-5.99)  |
| Small (>5 to <10 mm)                                                                | 4(1.12%)        | 10(6.02%)   | .009 | 5.75(1.56-21.25) | 1(0.38%)        | 3(2.94%)    | .30   | 4.40(0.27-70.83) |
| Large (≥10mm)                                                                       | 2(0.56%)        | 2(1.20%)    | .64  | 1.62(0.21-12.37) | 1(0.38%)        | 0(0.00%)    | NA    | NA               |
| <b>CAQ-c system</b>                                                                 |                 |             |      |                  |                 |             |       |                  |
| Diminutive (≤5 mm)                                                                  | 47(13.17%)      | 62(17.77%)  | .22  | 1.31(0.85-2.02)  | 14(5.32%)       | 46(16.73%)  | .001  | 3.08(1.60-5.94)  |
| Small (>5 to <10 mm)                                                                | 4(1.12%)        | 5(1.43%)    | .91  | 1.09(0.26-4.63)  | 1(0.38%)        | 10(3.64%)   | .04   | 9.20(1.10-76.85) |
| Large (≥10mm)                                                                       | 2(0.56%)        | 9(2.58%)    | <.05 | 4.89(1.01-23.77) | 1(0.38%)        | 9(3.27%)    | <.05  | 8.76(1.05-72.81) |
| <b>Combination system</b>                                                           |                 |             |      |                  |                 |             |       |                  |
| Diminutive (≤5 mm)                                                                  | 47(13.17%)      | 38(22.49%)  | .10  | 1.57(0.93-2.67)  | 14(5.32%)       | 34(34.34%)  | <.001 | 7.04(3.20-15.45) |
| Small (>5 to <10 mm)                                                                | 4(1.12%)        | 15(8.88%)   | .003 | 6.66(1.89-23.48) | 1(0.38%)        | 5(5.05%)    | .05   | NA               |
| Large (≥10mm)                                                                       | 2(0.56%)        | 10(5.92%)   | .02  | 7.29(1.47-36.04) | 1(0.38%)        | 3(3.03%)    | .14   | NA               |
| <b>PDR</b>                                                                          |                 |             |      |                  |                 |             |       |                  |
| <b>CADe system</b>                                                                  |                 |             |      |                  |                 |             |       |                  |
| Diminutive (≤5 mm)                                                                  | 142(39.78%)     | 97(58.43%)  | .02  | 1.66(1.08-2.57)  | 80(30.42%)      | 45(44.12%)  | .26   | 1.40(0.78-2.49)  |
| Small (>5 to <10 mm)                                                                | 10(2.80%)       | 11(6.63%)   | .08  | 2.35(0.90-6.13)  | 6(2.28%)        | 6(5.88%)    | .94   | 1.05(0.30-3.68)  |
| Large (≥10mm)                                                                       | 3(0.84%)        | 5(3.01%)    | .15  | 3.20(0.67-15.27) | 3(1.14)         | 1(0.98%)    | .91   | 0.86(0.06-11.84) |
| <b>CAQ-c system</b>                                                                 |                 |             |      |                  |                 |             |       |                  |
| Diminutive (≤5 mm)                                                                  | 142(39.78%)     | 164(46.99%) | .18  | 1.26(0.90-1.75)  | 80(30.42%)      | 133(48.36%) | .003  | 1.81(1.22-2.68)  |
| Small (>5 to <10 mm)                                                                | 10(2.80%)       | 9(2.58%)    | .88  | 0.93(0.35-2.44)  | 6(2.28%)        | 16(5.83%)   | .27   | 1.78(0.64-4.91)  |
| Large (≥10mm)                                                                       | 3(0.84%)        | 11(3.15%)   | .04  | 4.11(1.10-15.38) | 3(1.14)         | 10(3.64%)   | .11   | 3.01(0.77-11.76) |
| <b>Combination system</b>                                                           |                 |             |      |                  |                 |             |       |                  |
| Diminutive (≤5 mm)                                                                  | 142(39.78%)     | 103(60.95%) | .001 | 2.17(1.39-3.38)  | 80(30.42%)      | 60(60.61%)  | .001  | 2.71(1.50-4.89)  |
| Small (>5 to <10 mm)                                                                | 10(2.80%)       | 21(12.43%)  | .001 | 4.39(1.81-10.66) | 6(2.28%)        | 5(5.05%)    | .79   | 0.82(0.20-3.34)  |

|               |          |           |      |                  |         |          |     |                  |
|---------------|----------|-----------|------|------------------|---------|----------|-----|------------------|
| Large (≥10mm) | 3(0.84%) | 12(7.10%) | .003 | 8.22(2.00-33.76) | 3(1.14) | 4(4.04%) | .41 | 2.09(0.37-11.87) |
|---------------|----------|-----------|------|------------------|---------|----------|-----|------------------|

| <b>eTable 7. Different AI Systems Assistance Capabilities Among Different Locations</b> |                 |             |      |                 |                 |             |       |                  |
|-----------------------------------------------------------------------------------------|-----------------|-------------|------|-----------------|-----------------|-------------|-------|------------------|
|                                                                                         | Early session   |             |      |                 | Late session    |             |       |                  |
|                                                                                         | Control-c group | AI system   | P    | OR (95% CI)     | Control-c group | AI system   | P     | OR (95% CI)      |
| <b>ADR</b>                                                                              |                 |             |      |                 |                 |             |       |                  |
| CADe system                                                                             |                 |             |      |                 |                 |             |       |                  |
| Proximal Colon                                                                          | 22(6.16%)       | 21(12.65%)  | .12  | 1.72(0.87-3.41) | 8(3.04%)        | 10(9.80%)   | .07   | 3.06(0.93-10.09) |
| Distal Colon                                                                            | 29(8.12%)       | 26(15.66%)  | .09  | 1.70(0.91-3.15) | 7(2.66%)        | 6(5.88%)    | .41   | 2.20(1.80-7.24)  |
| CAQ-c system                                                                            |                 |             |      |                 |                 |             |       |                  |
| Proximal Colon                                                                          | 22(6.16%)       | 41(11.75%)  | .01  | 2.02(1.15-3.53) | 8(3.04%)        | 26(9.45%)   | .02   | 2.81(1.21-6.54)  |
| Distal Colon                                                                            | 29(8.12%)       | 35(10.03%)  | .71  | 1.11(0.65-1.89) | 7(2.66%)        | 34(12.36%)  | <.001 | 4.77(1.99-11.46) |
| Combination system                                                                      |                 |             |      |                 |                 |             |       |                  |
| Proximal Colon                                                                          | 22(6.16%)       | 23(13.61%)  | .04  | 2.10(1.05-4.20) | 8(3.04%)        | 19(19.19%)  | <.001 | 6.63(2.36-18.62) |
| Distal Colon                                                                            | 29(8.12%)       | 32(18.93%)  | .02  | 2.10(1.16-3.81) | 7(2.66%)        | 17(17.17%)  | .002  | 5.73(1.93-17.07) |
| <b>PDR</b>                                                                              |                 |             |      |                 |                 |             |       |                  |
| CADe system                                                                             |                 |             |      |                 |                 |             |       |                  |
| Proximal Colon                                                                          | 73(20.45%)      | 46(27.71%)  | .52  | 1.17(0.72-1.89) | 37(14.07%)      | 25(24.51%)  | .13   | 1.73(0.85-3.50)  |
| Distal Colon                                                                            | 113(31.65%)     | 82(49.40%)  | .03  | 1.62(1.05-2.50) | 60(22.81%)      | 37(36.27%)  | .16   | 1.55(0.85-2.82)  |
| CAQ-c system                                                                            |                 |             |      |                 |                 |             |       |                  |
| Proximal Colon                                                                          | 73(20.45%)      | 86(24.64%)  | .34  | 1.21(0.82-1.77) | 37(14.07%)      | 64(23.27%)  | .09   | 1.52(0.93-2.47)  |
| Distal Colon                                                                            | 113(31.65%)     | 122(34.96%) | .65  | 1.08(0.77-1.52) | 60(22.81%)      | 114(41.45%) | .001  | 2.00(1.32-3.03)  |
| Combination system                                                                      |                 |             |      |                 |                 |             |       |                  |
| Proximal Colon                                                                          | 73(20.45%)      | 50(29.59%)  | .13  | 1.45(0.89-2.35) | 37(14.07%)      | 31(31.31%)  | .006  | 2.59(1.32-5.09)  |
| Distal Colon                                                                            | 113(31.65%)     | 89(52.66%)  | .001 | 2.07(1.34-3.20) | 60(22.81%)      | 50(50.51%)  | .003  | 2.45(1.35-4.46)  |
