# Supplementary material for: Assessment of the Role of Artificial Intelligence in the Association Between Time of Day and Colonoscopy Quality
Source: PubMed Central journal article supplement (PMC9890283; doi:10.1001/jamanetworkopen.2022.53840), 2023-01-31
Supplement: jamanetwopen-e2253840-s002.pdf [file jamanetwopen-e2253840-s002.pdf]

## Data Sharing Statement

Lu. Assessment of the Role of Artificial Intelligence in the Association Between Time of Day and Colonoscopy Quality. *JAMA Netw Open*. Published January 31, 2023.  
doi:10.1001/jamanetworkopen.2022.53840

### Data

**Data available:** No
